1 Evaluation of the sensitivity and specificity of three diagnostic tests for *Coxiella burnetii*  
2 infection in cattle and buffaloes in Punjab (India) using Bayesian latent class analysis

3

4 E. Meletis<sup>a</sup>, R. Keshavamurthy<sup>b,c</sup>, B.B. Singh<sup>b,d</sup>, R.S. Aulakh<sup>b</sup>, N.K. Dhand<sup>d</sup>, P. Kostoulas<sup>a,\*</sup>

5

6 <sup>a</sup>*Faculty of Public and One (Integrated) Health, University of Thessaly, Mavromichali st.,*  
7 *Karditsa, 43100, Greece (Email: [emeletis@outlook.com](mailto:emeletis@outlook.com) [Meletis]; [pkost@uth.gr](mailto:pkost@uth.gr) [Kostoulas])*

8

9 <sup>b</sup>*School of Public Health & Zoonoses, Guru Angad Dev Veterinary and Animal Sciences*  
10 *University, Ludhiana, Punjab, 141004, India (Email: [r.keshavamurthy@wsu.edu](mailto:r.keshavamurthy@wsu.edu)*  
11 *[Keshavamurthy]; [bbsdhaliwal@gmail.com](mailto:bbsdhaliwal@gmail.com) [Singh]; [rsaulakh@rediffmail.com](mailto:rsaulakh@rediffmail.com) [Aulakh])*

12

13 <sup>c</sup>*Washington State University, Paul G. Allen School for Global Animal Health*

14

15 <sup>d</sup>*Sydney School of Veterinary Science, The University of Sydney, Camden, NSW, Australia*  
16 *(Email: [navneet.dhand@sydney.edu.au](mailto:navneet.dhand@sydney.edu.au) [Dhand])*

17

18

19 \*Corresponding author: Eleftherios Meletis (Email address: [emeletis@outlook.com](mailto:emeletis@outlook.com); Postal  
20 address: Mavromichali st., Karditsa, 43100, Greece)

21

22

## 23 Abstract

24

25 Q Fever is a zoonotic disease of significant animal and public health concern, caused by  
26 *Coxiella burnetii* (*C. burnetii*), an obligate intracellular bacterium. This study was done to  
27 evaluate the sensitivity (*Se*) and specificity (*Sp*) of three diagnostic methods to diagnose *C.*  
28 *burnetii* infection in cattle and buffaloes in Punjab, India: an indirect ELISA method applied in  
29 serum samples and a trans-Polymerase Chain Reaction (trans-PCR) technique applied in milk  
30 samples and genital swabs. Bayesian Latent Class Models were developed following the  
31 STARD-BLCM reporting guidelines. Conditional independence was assumed between the  
32 tests, given (i) the different biological principle of ELISA and trans-PCR and (ii) the fact that  
33 the trans-PCR was performed on different tissues. The ELISA method in the serum samples  
34 showed the highest *Se* of 0.97 (95% Probability Intervals (PIs): 0.93; 0.99) compared to the  
35 trans-PCR method applied in milk samples 0.76 (0.62; 0.87) and genital swabs 0.7 (0.55; 0.82).  
36 The *Sps* of all tests were high, with trans-PCR in genital swabs recording the highest *Sp* of 0.99  
37 (0.98; 1), while the *Sp* of trans-PCR in milk samples and ELISA in serum samples were 0.98  
38 (0.96; 0.99) and 0.95 (0.93; 0.97) respectively. The study results show that none of the applied  
39 tests are perfect, therefore, a testing regimen based on the diagnostic characteristic of the tests  
40 may be considered for diagnosis of *C. burnetii*.

41

42

43

## 44 **1. Introduction**

45

46 Q Fever is a zoonotic disease that was first described by Edward Holbrook Derrick (Derrick,  
47 1937) in Queensland. Q fever cases have been reported worldwide, except in New Zealand and  
48 Antarctica (Hilbink et al., 1993; Kaplan and Bertagna, 1955) and according to the OIE  
49 Terrestrial Animal Health Code, OIE countries and territories are obligated to report  
50 occurrences of the disease (OIE, 2018). Q stands for “query” and this designation was applied  
51 when the causative agent of the disease was unknown (OIE, 2018).

52

53 *Coxiella burnetii* (*C. burnetii*), an obligate intracellular Gram-negative coccobacillary  
54 bacterium was identified as the causative agent of Q fever in 1938 (Raoult and Marrie, 1995;  
55 McDade, 1990). *C. burnetii*, as a Gram-negative bacterium can display two different  
56 phenotypes. Phase I bacteria are highly virulent, while Phase II bacteria are avirulent (Roest et  
57 al., 2013). *C. burnetii*, has been isolated from many domestic and wild animals, birds and  
58 arthropods; however, cattle, buffaloes, sheep, goats and humans are commonly affected  
59 (Babudieri, 1959). The species under investigation in this study are cattle and buffaloes.  
60 Further, many Ixodidae and Argasidae ticks are considered reservoirs of the bacterium (Mauren  
61 and Raoult, 1999). Even though prevalence studies of *C. burnetii* in ticks yield negligible  
62 estimates, bacterium transmission to tick species is considered feasible (Sprong et al., 2010).

63

64 Circulation of the bacterium has been described in wild animals’ populations and arthropods  
65 and dispersion of the bacterium in domestic populations can occur through air, direct contact  
66 and animal secretions/excretions (e.g., vaginal discharge, placenta, milk, feces, urine, saliva,  
67 amniotic fluid) (Angelakis and Raoult, 2010).

68

69 Limited information on the pathogenesis of *C. burnetii* in domestic animals is available, while  
70 under laboratory conditions several studies based on different animal models (e.g., guinea pigs,  
71 mice) have been conducted (Roest et al., 2013). In most cases, inhalation of aerosols or dust  
72 contaminated with birth fluids is described as the main route of infection (Waag, 2007). The  
73 pathogenesis and associated histopathological findings depend on the route of infection (Roest  
74 et al., 2013). Large *C. burnetii* concentrations are present in the infected placenta and amniotic  
75 fluid, while infected cows can shed the microorganism in milk for up to 32 months (Marrie,  
76 2003). Guatteo et al. (2006) studied three different shedding routes - milk, vaginal mucus, feces  
77 - of the bacterium. Study results indicated no predominant *C. burnetii* shedding route and for  
78 the majority of shedder cows one shedding route was identified (Guatteo et al., 2006).

79

80 In livestock, the disease is usually subclinical, but the clinical form is associated with  
81 reproductive complications such as abortions, stillbirth, weak calves, repeat breeding and  
82 general clinical signs (e.g., anorexia) (Lang and Marie, 1990; EFSA, 2010; Keshavamurthy et  
83 al., 2019). Thus, *C. burnetii* excretion via feces, vaginal mucus and milk has been reported,  
84 sometimes independent of an abortion history (Roest et al., 2013).

85

86 Again, the host's immune response to limit the infection has been studied in animal models.  
87 Specifically, during infection macrophages are the major target cells, while T-cells -associated  
88 with cellular immunity- and B-cells -associated with humoral immunity-, are critical for *C.*  
89 *burnetii* clearance after infection and tissue damage prevention, respectively. Antibody  
90 detection differs between the two Phases and the species (Roest et al., 2013).

91

92 Further, for the species under investigation in this study – cattle and buffaloes- the course of  
93 infection is considered similar (Lucchese et al., 2016).

94

95 In humans, the disease is observed in the (i) acute form, where flu-like symptoms, atypical  
96 pneumonia, hepatitis and cardiac involvement may be present and (ii) chronic form, that is more  
97 severe, than the acute, and fatal without appropriate therapy (Arricau-Bouvery and Rodolakis,  
98 2005). Therefore, *C. burnetii* is characterized as a microorganism of great animal and public  
99 health concern.

100

101 Since there are no pathognomonic characteristics associated with *C. burnetii* infection,  
102 diagnosis poses a challenge. Many diagnostic tests, that are based on either the detection of the  
103 immune response of the host e.g., ELISA that detects antibodies directed against *C. burnetii* or  
104 the microorganism like Polymerase Chain Reaction (PCR) that detect bacterial DNA, have been  
105 used in epidemiological studies for *C. burnetii* to obtain estimates of the incidence and  
106 prevalence (Klemmer et al., 2018). However, prevalence estimation depends on the test's  
107 sensitivity (*Se*) and specificity (*Sp*), therefore, accurate diagnostic accuracy measures are  
108 important.

109

110 *C. burnetii* infection was first described in India in 1952 in a cattle herd and the first human  
111 case was reported in 1953 (Kalra and Taneja, 1954). Since then, the disease has been reported  
112 in several studies in India and an increasing trend in prevalence is reported, outlining *C. burnetii*  
113 as a potential threat to public health (Randhawa et al., 1973; Sodhi et. al., 1980; Vaidya et al.,  
114 2010; Keshavamurthy et. al., 2019; Shome et al., 2019; Yadav et al., 2019; Dhaka et al., 2020).  
115 Reported prevalence estimates from studies in India, conducted in a frequentist framework,  
116 assume that the applied diagnostic tests have perfect *Se* and *Sp* or imperfect, but known,  
117 measures of test accuracy. Further, a wide range of hosts, that *C. burnetii* is proven to affect,  
118 have been studied to better understand the microorganism's epidemiology (Vaidya et al., 2010).

119 Objective of this study is the diagnostic evaluation of the applied tests to detect *C. burnetii*  
120 infection in cattle and buffalo animals in Punjab, a state in northern India. Since no gold  
121 standard is reported for *C. burnetii*, the study was conducted in a Bayesian framework,  
122 following the STARD-BLCM guidelines (Kostoulas et al., 2017). The STARD-BLCM  
123 checklist is available as a supplementary material (see S1 Appendix).

124

125

## 126 2. Materials and methods

127

### 128 2.1. Ethics approval

129

130 This study was approved by the Institutional Animal Ethical Committee, Guru Angad Dev  
131 Veterinary and Animal Sciences University (GADVASU/2017/IAEC/42/02).

132

### 133 2.2. Study design

134 The study design is presented in detail elsewhere (Keshavamurthy et al., 2019). Briefly, a multi-  
135 stage sampling design was performed. Twenty-two villages, one per district, of the state were  
136 selected. Further, the number of households sampled in each village was selected, proportional  
137 to the number of households in a village. Overall, 179 households (cattle or buffalo herds)  
138 participated in the study. We worked towards collecting samples from all the animals for each  
139 household. However, many farmers were reluctant to provide samples from some of their  
140 animals. We recorded a response rate of 72.5% at the household level and 53.4% at the animal  
141 level, respectively (Keshavamurthy et al., 2019).

142

143 The sampling unit in this study were cattle and buffaloes. In the analysis cattle and buffaloes  
144 were considered as one population, referred as domestic bovine population, because (i) both  
145 species are members of Bovidae family (Michelizzi et al., 2010) and (ii) the course of the *C.*  
146 *burnetii* infection is similar in both species (Lucchese et al., 2016). Under this setting, the target  
147 population of the study was the domestic bovine population in the Punjab state.

148

### 149 2.3. Sample collection

150

151 Blood and genital swab samples were collected from the selected cattle and buffaloes. In  
152 addition, milk samples, from lactating female animals, were collected. Blood samples were  
153 collected aseptically from the jugular vein. Puncture area was cleaned with 70% alcohol and  
154 venipuncture was done using a fresh needle. Approximately 5 ml of blood was withdrawn from  
155 each animal in a sterile vacutainer. For the molecular study, genital swabs were collected from  
156 both male and female animals using sterile cotton swabs. Vaginal swab samples from female  
157 animals were collected by carefully inserting the swab into the vaginal cavity about 10 cm  
158 through followed by gently rotating the swab. In males, preputial swabs were collected by  
159 swabbing the penile and preputial surface. For the collection of milk samples from the lactating  
160 animals, udder and teats were cleaned using germicidal teat dip and three to four streams of  
161 milk was discarded before sampling to minimize risk of sample contamination. About 15 ml of  
162 milk sample was collected using sterile screw-capped vials.

163 All samples were transported to the laboratory on the sampling day and stored at -20°C. The  
164 sera were separated within 24h in the sterile cryovials before storing at -20°C until screened  
165 (Keshavamurthy et al., 2019).

166 Overall, 610 blood samples, 610 genital swabs and 361 milk samples were collected from the  
167 study population. Therefore, the samples were split into two subpopulations; subpopulation-1  
168 (subp\_1) includes lactating female animals and subpopulation-2 (subp\_2) includes male and  
169 non-lactating female animals. Overall, 400 of the sampled animals (65.5%) were lactating and  
170 221 (36.2%) were pregnant.

171

172

173 2.4. Laboratory tests

174



175 Milk samples and genital swabs were screened with PCR to detect bacterial DNA. Specifically,  
176 a trans-PCR assay was used to detect *C. burnetii* particles based on two transposon-like  
177 repetitive regions of the microorganism: Trans1: 5'-TAT GTA TCC ACC GTA GCC AGT C-  
178 3' and Trans2: 5'-CCC AAC AAC ACC TCC TTA TTC-3' (Willems et al., 1994).

179  
180 The serum samples were screened for *C. burnetii* antibodies using the commercial Q Fever  
181 indirect ELISA kit with Phase I and Phase II (ELISA Kit for serodiagnosis of Q Fever in cattle  
182 and small ruminants, Monowell, Bio-X Diagnostics, Rochefort, Belgique). The two Phases  
183 capture both the acute and chronic infection form. In particular, IgG antibody titers against  
184 Phase I antigens are elevated during the acute phase, whereas IgG antibody titers against Phase  
185 I and Phase II are elevated during the chronic phase (ELISA Kit for serodiagnosis of Q Fever  
186 in cattle and small ruminants, Monowell, Bio-X Diagnostics, Rochefort, Belgique). ELISA  
187 quantifies the immune response of the host against *C. burnetii* and does not provide information  
188 about the presence or absence of the bacterium. Broadly, serological techniques are useful for  
189 screening purposes e.g., monitor the vaccination effectiveness. This is not applicable in India,  
190 because a vaccination program for *C. burnetii* does not exist (Dhaka et al., 2020).

191

## 192 2.5. Bayesian latent class analysis

193

194 The diagnostic accuracy of the applied tests was estimated using a Bayesian latent class model  
195 (BLCM). Traditionally, in the absence of a “gold standard”, latent class models (Hui and  
196 Walter, 1980) can be used to obtain unbiased estimates. Over the last decades, Bayesian  
197 framework has been applied in latent class analyses, due to their flexibility, incorporation of  
198 prior knowledge and software availability (Enøe et al., 2000; Branscum et al., 2005). To ensure

199 transparency and extrapolation of the study results, the STARD-BLCM reporting guidelines  
200 for diagnostic accuracy studies that use BLCMs were followed (Kostoulas et al., 2017).

201

202 2.5.1. Definition of infection status

203

204 Explicit description of the biological principle of each applied test is crucial towards the  
205 structure of any BLCM model. Latent variables are hidden, or unknown and probabilistic  
206 estimates can be made for them in conjunction with what the tests actually detect (Walter and  
207 Irwig, 1988). In this study, the applied PCR technique in the milk samples (PCR-Milk) and the  
208 genital swabs (PCR-Genital) detects bacterial DNA i.e., presence or absence of the *C. burnetii*  
209 microorganism and ELISA measures antibodies titers i.e., immune host response (IgG ELISA).  
210 Therefore, two distinct biological principles are defined implying different latent states of the  
211 sampling unit i.e., it is possible that presence of the bacteria in the host does not always trigger  
212 host immune response.

213

214

215 Estimations were based on the cross-classified results (Table 1) of the applied tests in the two  
 216 subpopulations described above.

217 **Table 1.** Cross-classified results of IgG ELISA, PCR-Genital and PCR-Milk

| Lactating animals      |          | PCR-Genital <sup>1</sup> |          |          |          | Total | <sup>1</sup> PCR-Genital: |
|------------------------|----------|--------------------------|----------|----------|----------|-------|---------------------------|
|                        |          | Positive                 |          | Negative |          |       |                           |
|                        |          | PCR-Milk <sup>2</sup>    |          | PCR-Milk |          |       |                           |
|                        |          | Positive                 | Negative | Positive | Negative |       |                           |
| IgG ELISA <sup>3</sup> | Positive | 1                        | 0        | 3        | 23       | 27    |                           |
|                        | Negative | 0                        | 3        | 7        | 324      | 334   |                           |
| Total                  |          | 1                        | 3        | 10       | 347      | 361   |                           |
| Non-lactating animals  |          | PCR-Genital              |          |          |          | Total |                           |
|                        |          | Positive                 |          | Negative |          |       |                           |
| IgG ELISA              | Positive | 0                        |          | 6        |          | 6     |                           |
|                        | Negative | 0                        |          | 243      |          | 243   |                           |
| Total                  |          | 0                        |          | 249      |          | 249   |                           |

220 Polymerase Chain Reaction (PCR) in genital swabs

221 <sup>2</sup>PCR-Milk: PCR in milk samples

222 <sup>3</sup>IgG ELISA: ELISA in serum samples

223

224

225

## 226 2.5.2. Model assumptions

227

228 BLCM models, in the absence of a gold standard, for  $Se$  and  $Sp$  estimation can be constructed

229 under different assumptions. An applied set of assumptions adopted by Hui and Walter model

230 (two tests – two populations) state that (i) the population is divided into two or more

231 subpopulations in which two or more tests are evaluated (ii)  $Se$  and  $Sp$  of each test remain

232 constant across both species and both subpopulations and (iii) all tests are conditionally

233 independent given infection status (Toft et al., 2005). According to the literature, previous

234 Bayesian latent-class analyses for *C. burnetii* infection indicate that the  $Se$  and  $Sp$  of ELISA do

235 not vary between species (Lucchese et al., 2016). Conditional independence can be assumed,

236 on the basis that ELISA and PCR do not measure similar biological processes (Gardner et al.,

237 2000). Also, PCR-Milk and PCR-Genital were applied to different organs, therefore, presence  
238 (absence) of the infectious agent to one organ does not imply presence (absence) to other  
239 organs. Even though, the existence of distinct difference of the true prevalence between the  
240 subpopulations is proven to influence the precision of the estimates; this is not applicable in  
241 this case, i.e., the two subpopulations have the same true prevalence.

242

### 243 2.5.3. Model description

244

245 Bayesian modelling extracts the posterior probability given prior information and the likelihood  
246 function. The likelihood is computed through a statistical model for the observed data.

247

248 The models for the two subpopulations were structured assuming that the various test  
249 combinations follow the multinomial distribution. Specifically,

250

$$251 \quad y_{\text{subp}_1}[1:Q, 1:Q, 1:Q] \sim \text{dmulti}(p_1[1:Q, 1:Q, 1:Q], n_1)$$

252

$$253 \quad y_{\text{subp}_2}[1:Q, 1:Q] \sim \text{dmulti}(p_2[1:Q, 1:Q], n_2)$$

254

255 where  $y_{\text{subp}_1}$  and  $y_{\text{subp}_2}$  are the counts of various test combinations,  $Q = \{1,2\}$  the  
256 dichotomized test result i.e., 1 for positive and 2 for negative,  $n_1$  &  $n_2$  the two population sizes  
257 and  $p_1$  &  $p_2$  the probabilities of observing each test combination.

258

259 Based on this notation the frequencies of possible test outcomes can be calculated as followed:

$$260 \quad p_1[1,1,1] = p_i * Se_{ELISA} * Se_{Genital}^{PCR} * Se_{Milk}^{PCR} + (1 - p_i) * (1 - Sp_{ELISA}) * (1 - Sp_{Genital}^{PCR}) * (1 - Sp_{Milk}^{PCR})$$

261

$$p1[1,1,2] = pi * Se_{ELISA} * Se_{Genital}^{PCR} * (1 - Se_{Milk}^{PCR}) + (1 - pi) * (1 - Sp_{ELISA}) * (1 - Sp_{Genital}^{PCR}) * Sp_{Milk}^{PCR}$$

263

$$p2[1,1] = pi * Se_{ELISA} * Se_{Genital}^{PCR} + (1 - pi) * (1 - Sp_{ELISA}) * (1 - Sp_{Genital}^{PCR})$$

265

$$p2[2,2] = pi * (1 - Se_{ELISA}) * (1 - Se_{Genital}^{PCR}) + (1 - pi) * Sp_{ELISA} * Sp_{Genital}^{PCR}$$

267

268 Under this setting, the parameters to be estimated are seven (i.e.,  $Se_{ELISA}$ ,  $Se_{PCR-Genital}$ ,  $Se_{PCR-}$   
 269  $Milk$ ,  $Sp_{ELISA}$ ,  $Sp_{PCR-Genital}$ ,  $Sp_{PCR-Milk}$  and  $pi$  (true prevalence)), while the degrees of freedom  
 270 offered by the data are seven. Therefore, identifiability criteria are met and an uniform,  
 271 noninformative, Beta prior distribution  $Be(I, I)$  can be adopted for all parameters of interest.  
 272 However, degrees of freedom being higher than or equal to the number of parameters to be  
 273 estimated is a necessary but not always sufficient condition to ensure identifiability. In this  
 274 analysis, due to the sparsity of the observed data (i.e., zero cell observations for some of the  
 275 cross-classified results – see Table 1) the ability of the model to estimate the associated  
 276 parameters diminishes. Hence, informative priors were also introduced.

277

278 Prior information was supplied by one of the authors (B.B.S.), an epidemiologist, expert on  
 279 zoonoses and co-leader of a national project on “Epidemiology, burden and control of zoonotic  
 280 diseases in India”. Generally, not much is known about the differences in the  $Se$  and  $Sp$  of  
 281 similar diagnostic tests in cattle and buffalo populations. A latent class analysis conducted using  
 282 a Bayesian approach was performed to understand the differences in  $Se$  and  $Sp$  of ELISA in  
 283 cattle and goats (Lucchese et al., 2016). The authors reported ELISA  $Se$  and  $Sp$  values to be  
 284 0.97 and 0.98 in cattle and 0.98, 0.83 in goats, respectively (Lucchese et al., 2016). In detail,

285 estimates of the mean and the 95<sup>th</sup> percentile for all parameters were provided. Informative prior  
286 Beta distributions were calculated using the PriorGen R Package (Kostoulas, 2018) (Table 2).

287

288 **Table 2.** Mean and 95<sup>th</sup> percentiles for the sensitivity (*Se*) and specificity (*Sp*) priors of PCR  
289 and ELISA and the corresponding Beta distributions, *Be(a, b)*. The prior information was  
290 provided by one of the co-authors (B.B.S.).

291

| Test  | Parameter    | Mean (%) | 95 <sup>th</sup> percentile (%) | Be (a, b)               |
|-------|--------------|----------|---------------------------------|-------------------------|
| PCR   | <i>Se</i> *  | 75       | 85                              | <i>Be(32.58, 10.86)</i> |
|       | <i>Sp</i> ** | 95       | 99                              | <i>Be(40.78, 2.15)</i>  |
| ELISA | <i>Se</i>    | 97       | 99                              | <i>Be(122.51, 3.79)</i> |
|       | <i>Sp</i>    | 90       | 95                              | <i>Be(11.74, 1.3)</i>   |

292

293

294

295 2.5.4. Markov Chain Monte Carlo convergence and software

296

297 Models were run in the freeware program OpenBUGS (Spiegelhalter et al., 2007). Parameter  
298 estimates were based on analytical summaries of 100,000 iterations of two chains after a burn-in  
299 phase of 5000 iterations. The tools described in Toft et al., 2007, were monitored to ensure  
300 occurrence of convergence. The OpenBUGS code for the final model is available as a  
301 supplementary material (see S2 Appendix).

302

303 2.5.5. Sensitivity analysis

304

305 The influence of the data and the priors to the posterior estimates was examined by running the  
306 same model without informative prior values also. Different models under different set of  
307 assumptions were constructed to inspect the validity of the applied set of assumptions.

308 Specifically, to ensure constant  $Se$  and  $Sp$  across species models to examine this assumption  
309 were structured.  
310  
311 Model selection was based on the DIC (Deviance Information Criterion) dialog box in  
312 OpenBUGS environment. The model with the smallest DIC is the model that best fits the data  
313 i.e., the model that would best predict a replicate dataset of the same structure as the currently  
314 observed (Spiegelhalter et al., 2002).

### 315 3. Results

316

317 The posterior medians and 95% probability intervals (PIs) for the  $Se$  and  $Sp$  of each diagnostic  
318 test are summarized in Table 3.

319

320 **Table 3.** Posterior medians and 95% probability intervals (PrIs) for the  $Se$  and  $Sp$  of each  
321 diagnostic test using informative Beta prior distributions for the  $Se$  and  $Sp$  of each diagnostic  
322 test described in Table 2.

323

| Test        | Parameter | Posterior medians and 95% PrIs |
|-------------|-----------|--------------------------------|
| IgG ELISA   | $Se$      | 0.97 (0.93; 0.99)              |
|             | $Sp$      | 0.95 (0.93; 0.97)              |
| PCR-Genital | $Se$      | 0.7 (0.55; 0.82)               |
|             | $Sp$      | 0.99 (0.98; 1)                 |
| PCR-Milk    | $Se$      | 0.76 (0.62; 0.87)              |
|             | $Sp$      | 0.98 (0.96; 0.99)              |

324

325

326

327

328 IgG ELISA showed the highest  $Se$  with median 0.97 (95% PIs: 0.93; 0.99) compared to PCR-  
329 Milk 0.76 (0.62; 0.87) and PCR-genital 0.7 (0.55; 0.82). The  $Sp$ s of all tests were high, with  
330 PCR-Genital recording the highest  $Sp$  median of 0.99 (0.98; 1), while the  $Sp$  of PCR-Milk and  
331 IgG ELISA were 0.98 (0.96; 0.99) and 0.95 (0.93; 0.97) respectively.

332

333 The acquired estimates without informative prior distributions are shown in S1 Table. Under  
334 this setting, the  $Sp$  estimates are similar in both scenarios. However, the  $Se$  estimates were  
335 lower; the  $Se$  of IgG ELISA was 0.63 (0.17; 0.98), PCR-Genital 0.18 (0.02; 0.77) and PCR-  
336 Milk was 0.6 (0.13; 0.98).

337



338 Sensitivity analysis was performed to validate the assumption of constant accuracy across both  
339 species. Parameter estimates produced by applying a model only to cattle were not substantially  
340 different, validating the assumption of constant accuracy across both species (S2 Table).

341

342 The model described in Section 2.5.3. was the one with the smallest DIC compared to the  
343 ones that were introduced in the Sensitivity Analysis section.

344

#### 345 **4. Discussion**

346 In this study, BLCMs were used to estimate the Se and Sp of a trans-PCR applied in genital  
347 swabs and milk samples to detect *C. burnetii* DNA and an ELISA applied in serum samples  
348 that detects antibodies against *C. burnetii*, in cattle and buffaloes in Punjab, India. BLCMs  
349 account for the absence of a gold standard and allow parameter estimation merging two  
350 components (i) model structure, based on the observed data and (ii) incorporation of prior  
351 information (Kostoulas et al. 2017).

352

353 The study results show that all three tests are highly specific, with PCR-Genital yielding the  
354 higher Sp [0.99 (0.98; 1)], followed by PCR-Milk [0.98 (0.96; 0.99)] and IgG ELISA [0.95  
355 (0.93; 0.99)]. On the other hand, IgG ELISA has the highest Se [0.97 (0.93; 0.99)], followed  
356 by PCR-Milk [0.76 (0.62; 0.87)] and PCR-Genital [0.7 (0.55; 0.82)]. This seems reasonable, as  
357 serological techniques are in general more sensitive than molecular diagnostic techniques, due  
358 to several reasons e.g., cross-reaction (Joseph et al., 1995). Overall, the posterior medians and  
359 95% PIs for the PCR-Milk and PCR-Genital are comparable, indicating that both tests have the  
360 same diagnostic accuracy. Further, the Sps for these two tests, are not “prior-driven/dependent”,  
361 since both under informative and uniform, noninformative priors the posterior estimates are  
362 approximately the same. However, the reported estimates for the Ses of PCR-Milk, and  
363 especially PCR-Genital, seem to differ under noninformative and informative prior  
364 distributions [informative prior distributions; PCR-Milk 0.76 (0.62; 0.87) and PCR-Genital 0.7  
365 (0.55; 0.82); noninformative prior distributions; PCR-Milk 0.6 (0.13; 0.98) and PCR-Genital  
366 0.18 (0.02; 0.77)]. This is mainly due to the scarcity of the data i.e., small number of animals  
367 both positive to PCR-Milk and PCR-Genital. Further, the reported medians for the Se of PCR-  
368 Milk and PCR-Genital, using informative prior distributions, are included in the 95% PIs for  
369 the Ses under uniform, noninformative prior distributions. Implementation of informative prior

370 distributions allows shrinkage of the 95% PI for the  $S_e$ . Therefore, the final  $S_e$  estimates for  
371 the two PCRs can be considered reliable. As far as IgG-ELISA, even though, a high  $S_p$  is  
372 recorded, the  $S_e$  seems to be “prior-driven/dependent”. However, the information provided by  
373 the data may not be enough, since only thirty-three animals were tested positive in IgG-ELISA  
374 [1 PCR-Milk+, PCR-Genital+, 3 PCR Milk+, PCR-Genital-, 23 PCR-Milk-, PCR-Genital-, 6  
375 PCR-Genital-]. Therefore, IgG-ELISA  $S_e$  posterior estimates using uniform, noninformative  
376 prior distribution cannot be considered reliable. Again, the median for the  $S_e$  of IgG-ELISA,  
377 using informative priors is included in the 95% PI for the  $S_e$  under a uniform, noninformative  
378 prior setting.

379  
380 Studies on validation of diagnostic tests for *C. burnetii* infection using BLCMs have been  
381 conducted in cattle, goats, sheep etc. (Luchesse et al., 2016; Paul et al., 2013). The reported  $S_e$   
382 and  $S_p$  of the tests in our study are comparable between studies and similar between different  
383 species e.g., sheep and goats. (Abiri et al., 2019). The posterior medians and 95% PIs for the  
384 diagnostic characteristics of IgG-ELISA are similar to those reported in the literature and  
385 comparable with the estimates provided by the commercial ELISA kits manufacturers used for  
386 detection of antibodies against *C. burnetii* in serum samples from cattle (Luchese et al., 2016;  
387 Serrano-Pérez et al., 2015). The PCR method applied in milk samples has been evaluated in  
388 cattle (Nusinovici et al., 2015), in a Bayesian framework. The results from our study are similar  
389 with the ones reported in Nusinovici et al. (2015). The PCR method applied in genital swabs in  
390 cattle has not been evaluated; instead, PCR has been used for bacterial DNA detection in the  
391 farm environment (Nusinovici et al., 2015). On the other hand, PCR-Genital and PCR-Milk has  
392 been described in the sheep and goats (Abiri et al., 2019). The  $S_p$  for both PCRs and for the  $S_e$   
393 of PCR-Genital are similar, while the reported median and 95% PI for the  $S_e$  of PCR-Milk in  
394 Abiri et al. (2019) is lower [0.42 (0.32; 0.59)].

395

396 Conditional independence between PCR-Milk and PCR-ELISA was assumed, since, the  
397 method was applied to different organs, even though it is based on the same biological principle.  
398 Further, primary shedding route has not been identified for *C. burnetii* and isolation of the  
399 bacterium from more than two organs is rare (Table 1) (Guatteo et al., 2006), i.e., presence  
400 (absence) of the infectious agent in the genital tract does not imply presence (absence) to milk.  
401 The conditional independence assumption for a PCR method applied in milk and vaginal  
402 secretions in sheep and goat samples to detect *C. burnetii* has been adopted (Abiri et al., 2019).  
403 Therefore, this assumption can be considered valid. Moreover, the specified model has seven  
404 degrees of freedom and seven parameters of interest. If conditional independence was not  
405 assumed, then two extra parameters for the covariance terms will be added, and the  
406 identifiability criteria will not be met (degrees of freedom higher than or equal to the number  
407 of parameters of interest), hence, our model would not converge. Therefore, introducing two  
408 covariance terms, accounting for conditional dependence between PCR-Milk & PCR-Genital  
409 would result in an unidentifiable model. Even though, in our case we adopt the results using  
410 informative prior distributions, we do so, due to the scarcity of the data (zero cell observations  
411 for animals positive to IgG-ELISA, PCR-Milk, PCR-Genital). Thus, informative prior  
412 distributions are added, instead of noninformative, to overcome the sparsity of the data. As  
413 shown in S2 Table the specified model using uniform, noninformative priors converges, but  
414 results to 95% PIs with high width.

415

416 Furthermore, the course of infection in the two species under investigation was considered  
417 similar, hence the diagnostic tests properties were assumed constant across species. Applying  
418 the model only to the cattle population yields posterior estimates similar to the ones after  
419 applying the final selected model (S2 Table). In India, risk factor investigation studies present

420 contrasting results in the risk of occurrence of *C. burnetii* infection in bovine populations. A  
421 recent study conducted in Bihar and Assam states of India reported higher risk of infection for  
422 buffaloes than in cattle (28.0% compared to 13.6%,  $p=0.042$ ) at the species level (Shome et al.,  
423 2019). However, only 25 buffaloes as compared to 719 cattle were included in this study  
424 (Shome et al, 2019). On the other hand, similar investigations in Punjab reported that cattle  
425 (adjusted Odds Ratio 3.37, 95% Confidence interval 1.23-9.20,  $p=0.02$ ) were associated with  
426 larger odds of *C. burnetii* positive animal status than buffaloes (Keshavamurthy et al., 2020).  
427 Based on these results, our assumption that the course of infection and disease occurrence does  
428 not vary much in cattle and buffaloes at the species level is valid and there are other factors that  
429 need further investigation.

430

431 In this analysis, usage of informative priors improved the fit of the model, as indicated by the  
432 DIC. This is essential to account for the sparsity of the observed data. Assuming noninformative  
433 priors generates estimates with very wide PIs that do not allow safe conclusions about the tests'  
434 accuracy.

435

436

437

## 438 **5. Conclusion**

439

440 This study was conducted to estimate the *Se* and *Sp* of three tests used for *C. burnetii* detection  
441 in Punjab, India. IgG ELISA achieved the highest *Se*, while PCR-Genital had the highest *Sp*.

442 Using BLCMs, none of the applied tests showed perfect *Se* and *Sp*, and therefore, could not be

443 used alone to diagnose *C. burnetii* infection in domestic bovine populations. Further, it is

444 proven that the diagnostic accuracy of the tests does not vary between the two bovine species.

445 In conclusion, better information on *C. burnetii* infection can be provided using a combination

446 of diagnostic tests based on different biological principles i.e., detection of bacterial DNA and

447 immune host response.

448

## 449 **Acknowledgments**

450

451 The India Council for Agricultural Research, Government of India, New Delhi through the

452 “Outreach Programme for Zoonotic Investigations” are thanked for their financial support of

453 the present study.

454

## 455 **Declarations of interest**

456 None

457

458 **References**

459

460 Abiri Z, Khalili M, Kostoulas P, Sharifi H, Rad M, Babaei H. Bayesian estimation of sensitivity  
461 and specificity of a PCR method to detect *Coxiella burnetii* in milk and vaginal secretions in  
462 sheep and goat samples. J. Dairy Sci. 2019;102: 4954-4959.

463

464 Angelakis E, Raoult D. Q fever. Vet. Mic. 2010;140: 297-309.

465

466 Arricau-Bouvery N, Rodolakis A. Is Q fever an emerging or re-emerging zoonosis?. Vet. Res.  
467 2005;36: 327-349.

468

469 Babudieri B. Q fever: a zoonosis. Adv. Vet. Sci. 1959;5: 81

470

471 Branscum AJ, Gardner IA, Johnson WO. Estimation of diagnostic-test sensitivity and  
472 specificity through Bayesian modeling. Pre. Vet. Med. 2005;68: 145-163.

473

474 Burnet FM, Freeman M. Experimental Studies on the Virus of "Q" Fever. Med. J. Aus. 1937;2:  
475 299-305.

476

477 Derrick EH. "Q" Fever, a New Fever Entity: Clinical Features, Diagnosis and Laboratory  
478 Investigation. Med. J. Aus. 1937;2: 281-299.

479

480 Dhaka P, Malik SVS, Yadav JP, Kumar M, Barbuddhe SB, Rawool DB. Apparent prevalence  
481 and risk factors of coxiellosis (Q fever) among dairy herds in India. PloS One, 2020;15:  
482 e0239260.

483

484 EFSA Panel on Animal Health and Welfare (AHAW). Scientific Opinion on Q fever. EFSA  
485 Journal. 2010;8: 1595.

486

487 Enøe C, Georgiadis MP, Johnson WO. Estimation of sensitivity and specificity of diagnostic  
488 tests and disease prevalence when the true disease state is unknown. Pre. Vet. Med. 2000;45:  
489 61-81.

490

491 Gardner IA, Stryhn H, Lind P, Collins MT. Conditional dependence between tests affects the  
492 diagnosis and surveillance of animal diseases. Prev. Vet. Med. 2000;45: 107-122.

493

494 Guatteo R, Beaudeau F, Berri M, Rodolakis A, Joly A, Seegers H. Shedding routes of *Coxiella*  
495 *burnetii* in dairy cows: implications for detection and control. Vet. Res. 2006;37: 827-833.

496

497 Hilbink F, Penrose M, Kovacova E, Kazar J.. Q fever is absent from New Zealand. Int. J.  
498 Epidemiol. 1993;22: 945-949.

499

500 Hui, S.L., Walter, S.D., 1980. Estimating the error rates of diagnostic tests. Biometrics, 167-  
501 171.

502

503 Joseph L, Gyorkos TW, Coupal L. Bayesian estimation of disease prevalence and the  
504 parameters of diagnostic tests in the absence of a gold standard. Am. J. Epidemiol. 1995;141:  
505 263-272.

506



507 Kalra SL, Taneja BL. Q fever in India: a serological survey. Indian J. Med. Res. 1954;42: 315-  
508 318.  
509  
510 Kaplan MM, Bertagna P. The geographical distribution of Q fever. Bull. World Health Organ.  
511 1955;13: 829.  
512  
513 Keshavamurthy R, Singh BB, Kalambhe DG, Aulakh RS, Dhand NK. Prevalence of *Coxiella*  
514 *burnetii* in cattle and buffalo populations in Punjab, India. Prev. Vet. Med. 2019;166: 16-20.  
515  
516 Keshavamurthy R, Singh BB, Kalambhe, DG, Aulakh RS, Dhand NK. Identification of risk  
517 factors associated with *Coxiella burnetii* infection in cattle and buffaloes in India. Prev. Vet.  
518 Med. 2020;181: 105081.  
519  
520 Klemmer J, Njeru J, Emam A, El-Sayed A, Moawad AA, Henning K, et al. Q fever in Egypt:  
521 Epidemiological survey of *Coxiella burnetii* specific antibodies in cattle, buffaloes, sheep, goats  
522 and camels. PloS One. 2018;13: e0192188.  
523  
524 Kostoulas P. PriorGen: Generates Prior Distributions for Proportions. R 364 Packag. version,  
525 2018;1: 365.  
526  
527 Kostoulas P, Nielsen SS, Branscum AJ, Johnson WO, Dendukuri N, Dhand NK, et al. STARD-  
528 BLCM: Standards for the Reporting of Diagnostic accuracy studies that use Bayesian Latent  
529 Class Models. Prev. Vet. Med. 2017;138: 37-47.  
530

531 Lang GH, Marrie TJ. Coxiellosis (Q fever) in animals. In Q Fever: the disease. CRC Press,  
532 New York, USA; 1990. pp. 23-48.

533

534 Lucchese L, Capello K, Barberio A, Ceglie L, Guerrini E, Zuliani F, et al. Evaluation of  
535 serological tests for Q fever in ruminants using the latent class analysis. Clin. Res. Infect. Dis.  
536 2016;3: 1-5.

537

538 Marrie TJ. Coxiella burnetii pneumonia. Eur. Respir. J. 2003;21: 713-719.

539

540 Maurin M, Raoult DF. Q fever. Am. Soc. Microbiol. 1999;12: 518-553.

541

542 McDade JE, Marrie TJ. Historical Aspects of Q Fever. In Q Fever: the disease. CRC Press,  
543 New York, USA; 1990. pp. 5-21.

544

545 Michelizzi VN, Dodson MV, Pan Z, Amaral MEJ, Michal JJ, McLean DJ, et al. Water buffalo  
546 genome science comes of age. Int. J. Biol. Sci. 2010;6: 333.

547

548 Nusinovici S, Madouasse A, Hoch T, Guatteo R, Beaudeau F. Evaluation of two PCR tests for  
549 *Coxiella burnetii* detection in dairy cattle farms using latent class analysis. PloS One. 2015;10:  
550 e0144608.

551

552 Paul S, Toft N, Agerholm JS, Christoffersen AB, Agger JF. Bayesian estimation of sensitivity  
553 and specificity of Coxiella burnetii antibody ELISA tests in bovine blood and milk. Prev. Vet.  
554 Med. 2013;109: 258-263.

555

- 556 Randhawa AS, Dhillon SS, Jolley WB. Serologic prevalence of Q fever in the state of Punjab,  
557 India. Am. J. Epidemiol. 1973;97: 131-134.  
558
- 559 Raoult D, Marrie T. Q fever. Clin. Infect. Dis. 1995;489-495.  
560
- 561 Roest HI, Bossers A, van Zijderveld FG, Rebel JM. Clinical microbiology of *Coxiella burnetii*  
562 and relevant aspects for the diagnosis and control of the zoonotic disease Q fever. Vet. Q.  
563 2013;33: 148-160  
564
- 565 Serrano-Pérez B, Almería S, Tutusaus J, Jado I, Anda P, Monleón E, Badiola J, et al. *Coxiella*  
566 *burnetii* total immunoglobulin G, phase I and phase II immunoglobulin G antibodies, and  
567 bacterial shedding in young dams in persistently infected dairy herds. J. Vet. Diagn. Invest.  
568 2015;27: 167-176.  
569
- 570 Shome R, Deka RP, Milesh L, Sahay S, Grace S, Lindahl JF. *Coxiella* seroprevalence and risk  
571 factors in large ruminants in Bihar and Assam, India. Acta tropica, 2019;194: 41-46.  
572
- 573 Sodhi SS, Joshi DV, Sharma DR, Baxi KK. Seroprevalence of brucellosis and Q fever in dairy  
574 animals. Zbl. Vet. Med. B. 1980;27: 683-685.  
575
- 576 Spiegelhalter DJ, Best NG, Carlin BP, Van Der Linde A. Bayesian measures of model  
577 complexity and fit. J. R. Stat. Soc. Series b (Stat Methodol). 2002;64: 583-639.  
578
- 579 Spiegelhalter D, Thomas A, Best N, Lunn D. OpenBUGS user manual, version 3.0. 2. MRC  
580 Biostatistics Unit, Cambridge. 2007.

581

582 Sprong H, Tijssse-Klasen E, Langelaar M, De Bruin A, Fonville M, Gassner F, et al. Prevalence  
583 of *Coxiella burnetii* in ticks after a large outbreak of Q fever. *Zoonoses Public Health*. 2012;59:  
584 69-75.

585

586 Toft N, Jørgensen E, Højsgaard S, Diagnosing diagnostic tests: evaluating the assumptions  
587 underlying the estimation of sensitivity and specificity in the absence of a gold standard. *Prev.*  
588 *Vet. Med.* 2005;68: 19-33.

589

590 Toft N., Innocent GT, Gettinby G, Reid SW. Assessing the convergence of Markov Chain  
591 Monte Carlo methods: an example from evaluation of diagnostic tests in absence of a gold  
592 standard. *Prev. Vet. Med.* 2007;79: 244-256.

593

594 Yadav JP, Malik SVS, Dhaka P, Kumar M, Bhoomika S, Gourkhede D, et al. Seasonal variation  
595 in occurrence of *Coxiella burnetii* infection in buffaloes slaughtered in India. *Biol. Rhythm Res.*  
596 2019;1-7.

597

598 Vaidya VM, Malik SVS, Bhilegaonkar KN, Rathore RS, Kaur S, Barbuddhe SB. Prevalence of  
599 Q fever in domestic animals with reproductive disorders. *Comp. Immunol. Microbiol. Infect.*  
600 *Dis.* 2010;33: 307-321.

601

602 Waag DM. *Coxiella burnetii*: host and bacterial responses to infection. *Vaccine*, 2007;25:  
603 7288-7295.

604

605 Walter SD, Irwig LM. Estimation of test error rates, disease prevalence and relative risk from  
606 misclassified data: a review. *J. Clin. Epidemiol.* 1988;41: 923-937.

607

608 Willems H, Thiele D, Frölich-Ritter R, Krauss H. Detection of *Coxiella burnetii* in cow's milk  
609 using the polymerase chain reaction (PCR). *J. Vet. Med. Series B.* 1994;41: 580-587.

610

611 World Organisation for Animal Health (OIE) Terrestrial Manual. Chapter 3.1.16 Q Fever.

612 2018; Available from:

613 [https://www.oie.int/fileadmin/Home/eng/Health\\_standards/tahm/3.01.16\\_Q\\_FEVER.pdf](https://www.oie.int/fileadmin/Home/eng/Health_standards/tahm/3.01.16_Q_FEVER.pdf)

614

615

616 **Supporting information**

617 **S1 Table. S1\_Table\_file.** Posterior medians and 95% PrIs for the sensitivity (Se) and  
618 specificity (Sp) of each diagnostic test using noninformative Beta prior distributions for all  
619 parameters of interest.

620 **S2 Table. S2\_Table\_file.** Posterior medians and 95% PrIs for the Se and Sp of each diagnostic  
621 test applying the model only to cattle population, assuming (i) informative Beta prior  
622 distributions for the Se and Sp of each diagnostic test and (ii) noninformative Beta prior  
623 distributions for all parameters of interest.

624 **S1 Appendix. STARD-BLCM Checklist.**

625 **S2 Appendix. OpenBUGS Code**

626
